# Supplementary material for: A digital microfluidic device with integrated nanostructured microelectrodes for electrochemical immunoassays
Source: Royal Society of Chemistry journal article supplement (doi:10.1039/c5lc00660k), 2015-01-01
Supplement: c5lc00660k1.pdf [file c5lc00660k1.pdf]

## Supplementary Methods and Figures for

### A digital microfluidic device with integrated nanostructured microelectrodes for electrochemical immunoassays

Darius G. Rackus,<sup>1,2</sup> Michael D.M. Dryden,<sup>1</sup> Julian Lamanna,<sup>1</sup> Alexander Zaragoza,<sup>3</sup> Brian Lam,<sup>3</sup> Shana O. Kelley,<sup>1,3,4,5†</sup> Aaron R. Wheeler<sup>1,2,4†</sup>

1 Department of Chemistry, University of Toronto, 80 St. George St., Toronto, ON, M5S 3H6

2 Donnelly Centre for Cellular and Biomolecular Research, University of Toronto, 160 College St., Toronto, ON, M5S 3E1

3 Department of Pharmaceutical Sciences, Leslie Dan Faculty of Pharmacy, University of Toronto, 144 College St., Toronto, ON, M5S 3M2

4 Institute for Biomaterials and Biomedical Engineering, University of Toronto, 164 College St., Toronto, ON, M5S 3G9

5 Department of Biochemistry, Faculty of Medicine, University of Toronto, 1 King's College Circle, Toronto, ON, M5S 1A8

†Corresponding Authors

S.O.K

email: [shana.kelley@utoronto.ca](mailto:shana.kelley@utoronto.ca)

tel: +1 (416) 978 8641

A.R.W

email: [aaron.wheeler@utoronto.ca](mailto:aaron.wheeler@utoronto.ca)

tel: +1 (416) 946 3864

fax: +1 (416) 946 3865

## Surface area and plating current correlation

Nanostructured microelectrodes (NMEs) were prepared on DMF top plates by the electrodeposition method described in the main text, but instead of a current-setpoint, plating potential was applied for durations of 200, 250, or 300 s, recording the current at the final time point. Figure S1 summarizes the data obtained for five batches of six NMEs each generated with plating durations of 300s; the intra-batch precisions range from 6.8% to 10.6% relative standard deviation (RSD), and the inter-batch precision is 17.2 % RSD.

Electroactive surface areas of NMEs formed with a range of plating currents were estimated by cyclic voltammetry in 0.5 M H<sub>2</sub>SO<sub>4(aq)</sub>, scanning from 0.2 to 1.5 V (vs Ag/AgCl) at 100 mV s<sup>-1</sup>. The observed oxide reduction peak (0.66 V) was used to estimate the surface area of the working electrode by the oxygen adsorption method according to equation 1:

$$A = \frac{Q}{Q_{ref}} \quad (1)$$

where  $A$  is the surface area,  $Q$  is the reduction charge and  $Q_{ref}$  is the reference charge for polycrystalline gold of 386  $\mu\text{C cm}^{-2}$  (R. Woods, *Electroanalytical Chemistry: A Series of Advances*, New York, Dekker, 1980). Figure S2 shows the measured surface area as a function of the final plating current. A line of regression was fit to the data ( $y=0.1227 x - 0.2966$ ) with  $R^2=0.9655$ .

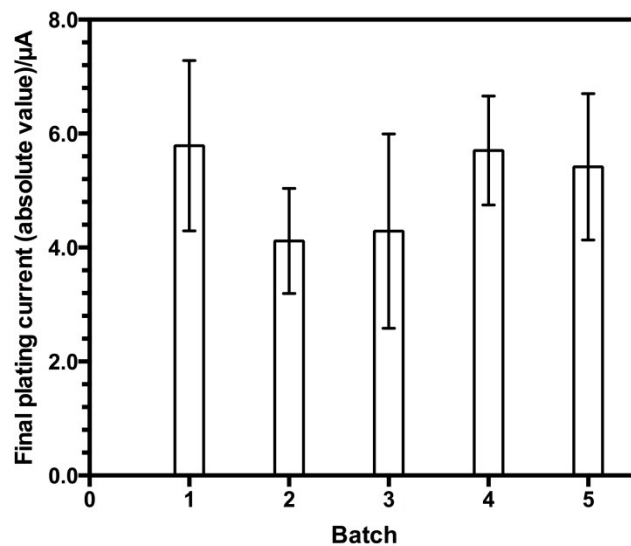

**Figure S1** Final plating currents (absolute values)  $i$  measured at  $t = 300$  s at 0 V vs. Ag/AgCl.

Each batch included six NMEs, and error bars represent  $\pm 1$  s.d.

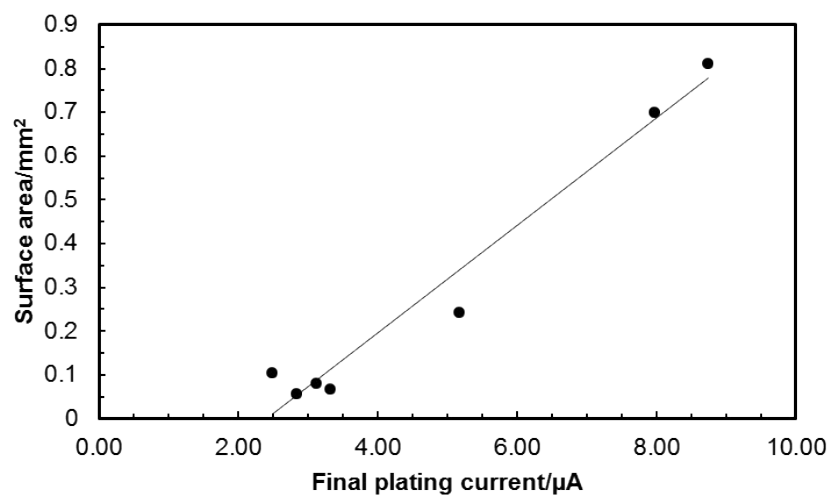

**Figure S2** Surface area of NMEs measured by oxygen desorption relative to the absolute value of the final plating current.
